# Supplementary material for: 3D‐Printed Reinforcement Scaffolds with Targeted Biodegradation Properties for the Tissue Engineering of Articular Cartilage
Source: PubMed Central journal article supplement — Adv Healthc Mater. 2021 Oct 18;10(23):2101094. doi: 10.1002/adhm.202101094 (PMC11469315; doi:10.1002/adhm.202101094), 2021-10-18
Supplement: ADHM-10-2101094-s001.pdf [file ADHM-10-2101094-s001.pdf]

WILEY-VCH

© 2021 Wiley-VCH GmbH

**ADVANCED  
HEALTHCARE  
MATERIALS**

## Supporting Information

for *Adv. Healthcare Mater.*, DOI: 10.1002/adhm.202101094

3D-Printed Reinforcement Scaffolds with Targeted  
Biodegradation Properties for the Regeneration of Articular  
Cartilage

*Enrico Tosoratti<sup>†</sup>, Philipp Fisch<sup>†</sup>, Scott Taylor, Lee Ann Applegate,  
Marcy Zenobi-Wong\**

**Supporting Information**

**3D-Printed Reinforcement Scaffolds with Targeted Biodegradation Properties for the Regeneration of Articular Cartilage**

*Enrico Tosoratti<sup>†</sup>, Philipp Fisch<sup>†</sup>, Scott Taylor, Lee Ann Applegate, Marcy Zenobi-Wong\**

**Figure S1**

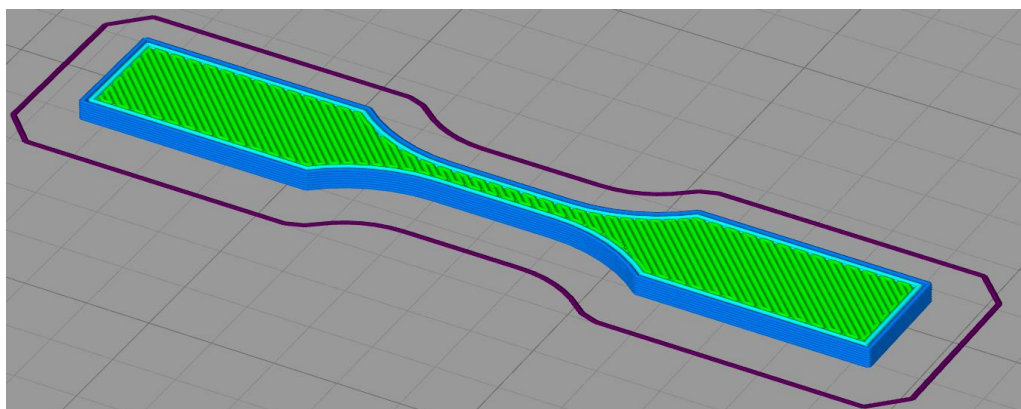

**Figure S1: Sliced model.** Sliced model of the 3D printed tensile bar for tensile strength and UTS analysis of Lactoprene® 7415.

**Figure S2**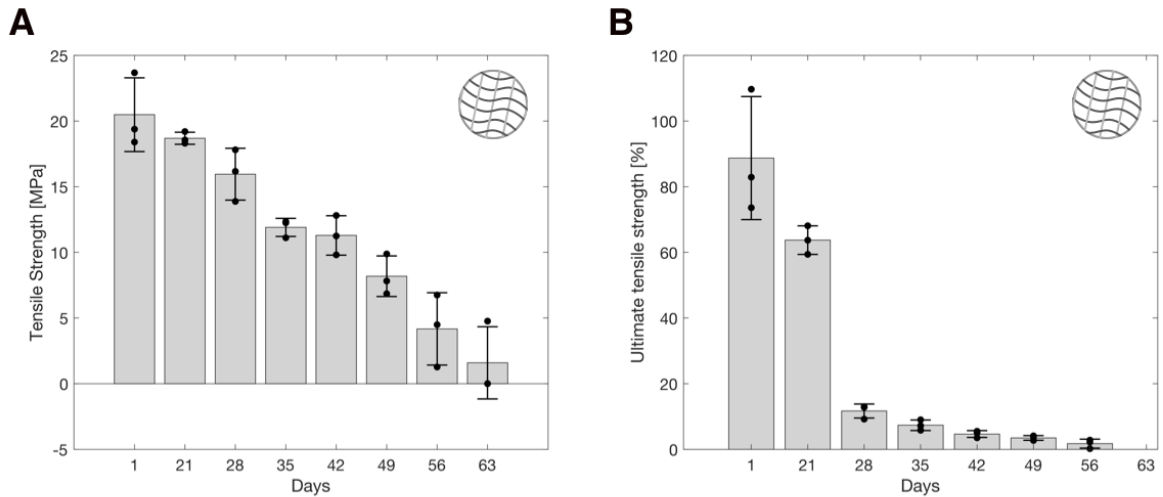

**Figure S2: Mechanical data of 3D printed tensile bars of Lactoprene® 7415.** A) Tensile strength. Each experimental data point was found statistically significant with respect to day 1, except for day 21 and day 28. B) Ultimate tensile strength. Each timepoint was found statistically significant with respect to day 1. Data represents mean and standard deviation of  $n=3$  independent experiments.  $P$  values were calculated using a simple t-test.

**Figure S3**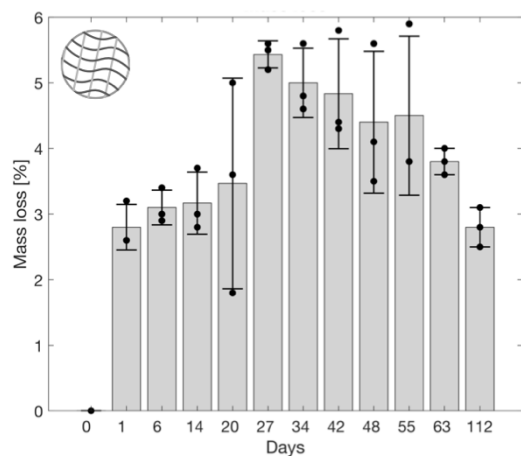

**Figure S3: Mass loss in media of Lactoprene® 7415 3D printed samples.** Data represents mean and standard deviation of  $n=3$  independent experiments. Each timepoint was found statistically significant with respect to day 0. The  $p$  value was determined using a simple t-test.

Figure S4

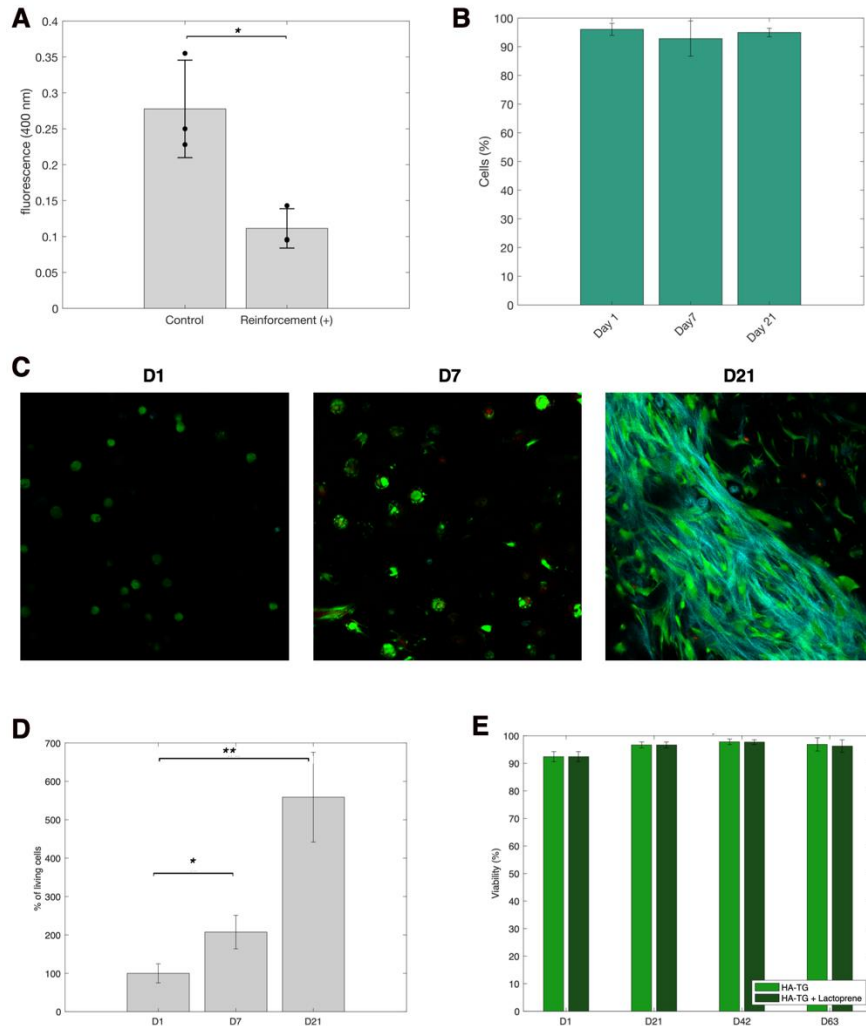

**Figure S4: Preliminary's experiment.** A) MTS assay. B) Viability quantification. C) Viability pictures at day 1, day 7 and day 21. D) Proliferation of Figure S4C. Data represents mean and standard deviation of n=3 independent experiments. The *p* value was determined a simple t-test.

Figure S5

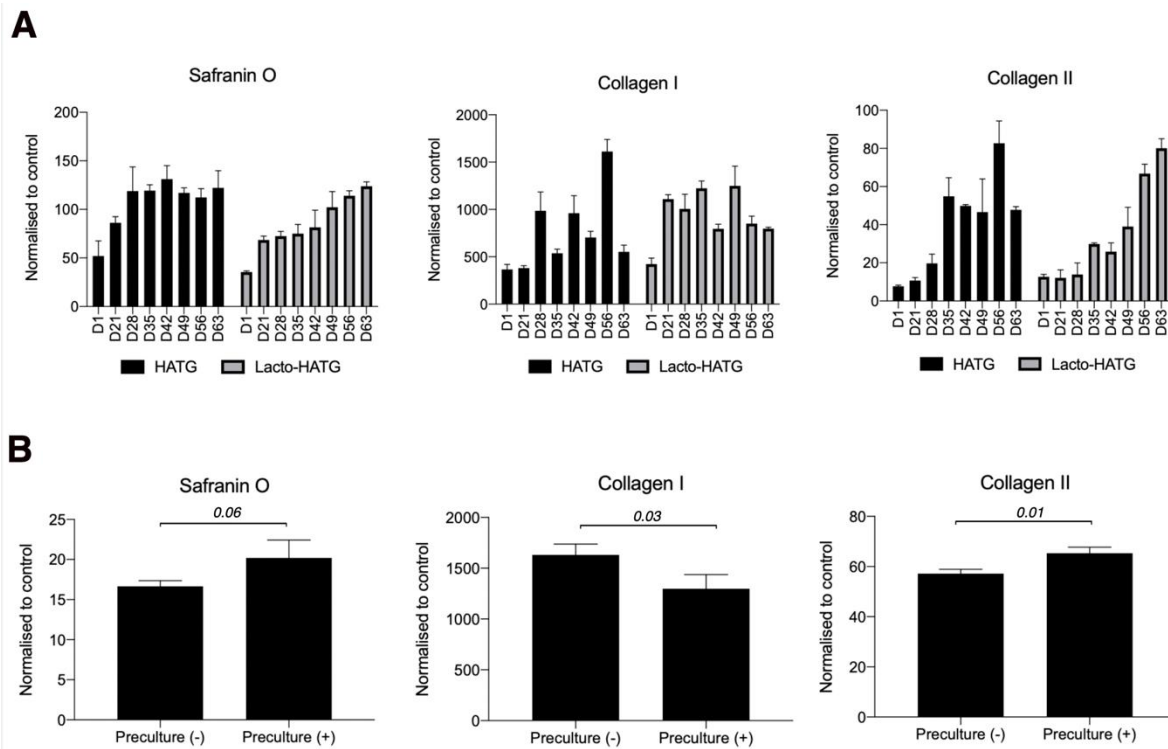

**Figure S5: Histology quantification.** A) Quantification of Safranin O, Collagen I and Collagen II of the histological data of Figure 3B. B) Quantification of Safranin O, Collagen I and Collagen II of the histological data of Figure 4C. Data represents mean and standard deviation of n=3 independent experiments. The *p* value was determined using a simple t-test.

**Figure S6**

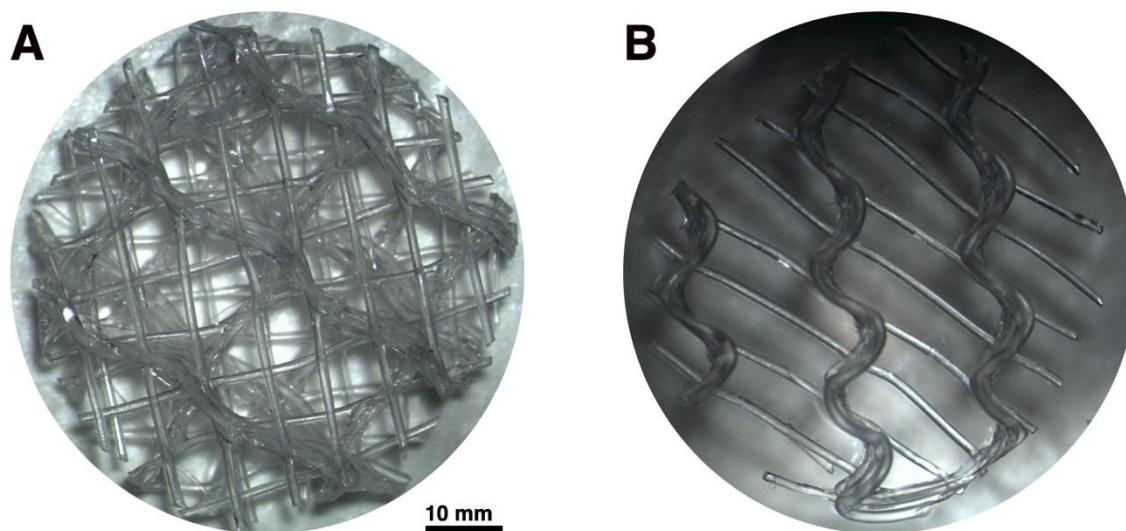

**Figure S6: Porosity evaluation of the Lactoprene® 7415 3D printed samples. A) Top view. B) View of the first two layers.**
